# Supplementary material for: Development of a novel method to grow mono-/few-layered MoS2films and MoS2–graphene hybrid films for supercapacitor applications
Source: Royal Society of Chemistry journal article supplement (doi:10.1039/c4ce01595a), 2014-10-06
Supplement: c4ce01595a1.pdf [file c4ce01595a1.pdf]

Electronic Supplementary Information

# **Development of a novel method to grow MoS<sub>2</sub> mono/few-layer films and MoS<sub>2</sub>-graphene hybrid films for supercapacitor applications†**

Sagar Patil,<sup>1</sup> Arti Harle,<sup>1</sup> Shivaram Sathaye<sup>2</sup> and Kashinath Patil<sup>1\*</sup>

<sup>1</sup> National Chemical Laboratory, Dr. Homi Bhabha Road, Pashan, Pune- 411008, India.

<sup>2</sup>759/83 Deccan Gymkhana, Pune 411004, India.

AUTHOR EMAIL ADDRESS : [kr.patil@ncl.res.in](mailto:kr.patil@ncl.res.in)

CORRESPONDING AUTHOR FOOTNOTE

Tel. No. : 91-020 25902250

Mob. No. : 9881045770

Fax No. : (020) 25902647

E-mail : [kr.patil@ncl.res.in](mailto:kr.patil@ncl.res.in)

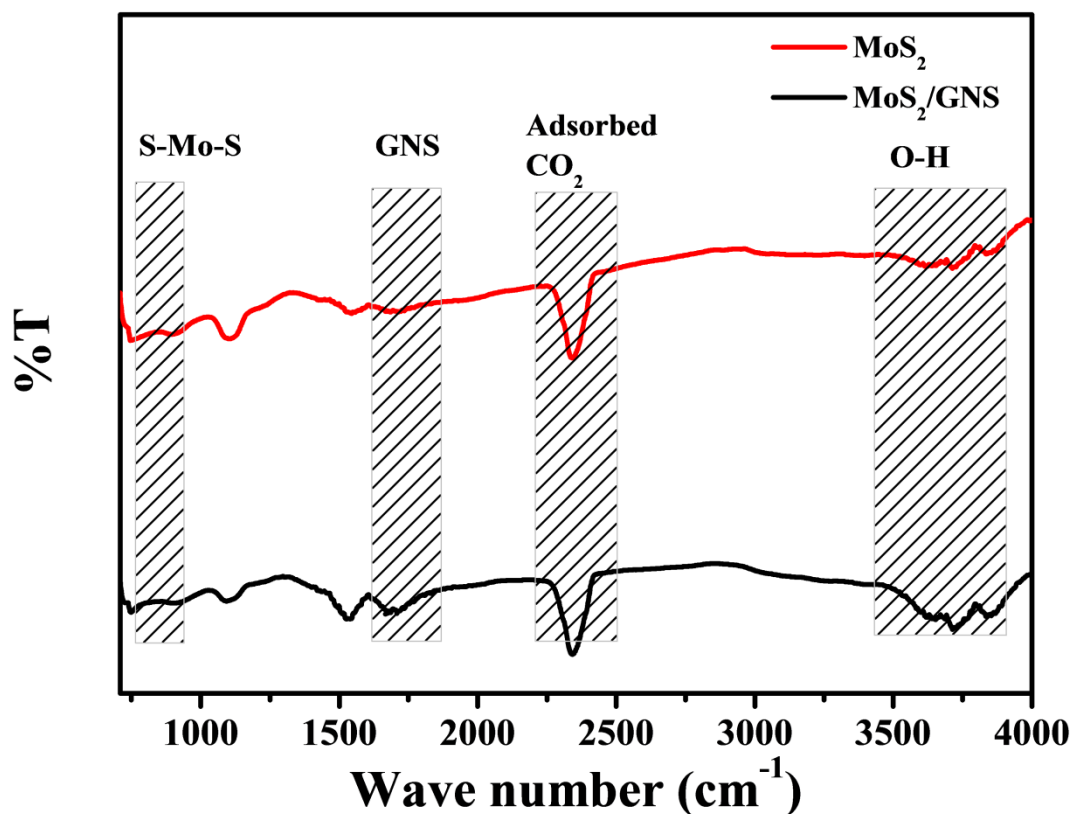

Fig. S1. Fourier transform infrared spectra of MoS<sub>2</sub> nanosheets and MoS<sub>2</sub>-GNS composites.

FT-IR spectra of MoS<sub>2</sub>-GNS composites were compared between 400 – 4000 cm<sup>-1</sup>. As shown in Fig. S1, in the FT-IR spectra, the bands between 3400 to 3700 cm<sup>-1</sup> are attributed to the oxygen containing functional groups of graphene.<sup>1</sup> The peak at 2260 cm<sup>-1</sup> were caused by CO<sub>2</sub> adsorbed in the sample.<sup>2</sup> Furthermore, the observed absorption band between “1620-1730 cm<sup>-1</sup>” for MoS<sub>2</sub>-GNS, indicates the skeletal vibration of graphene sheets.

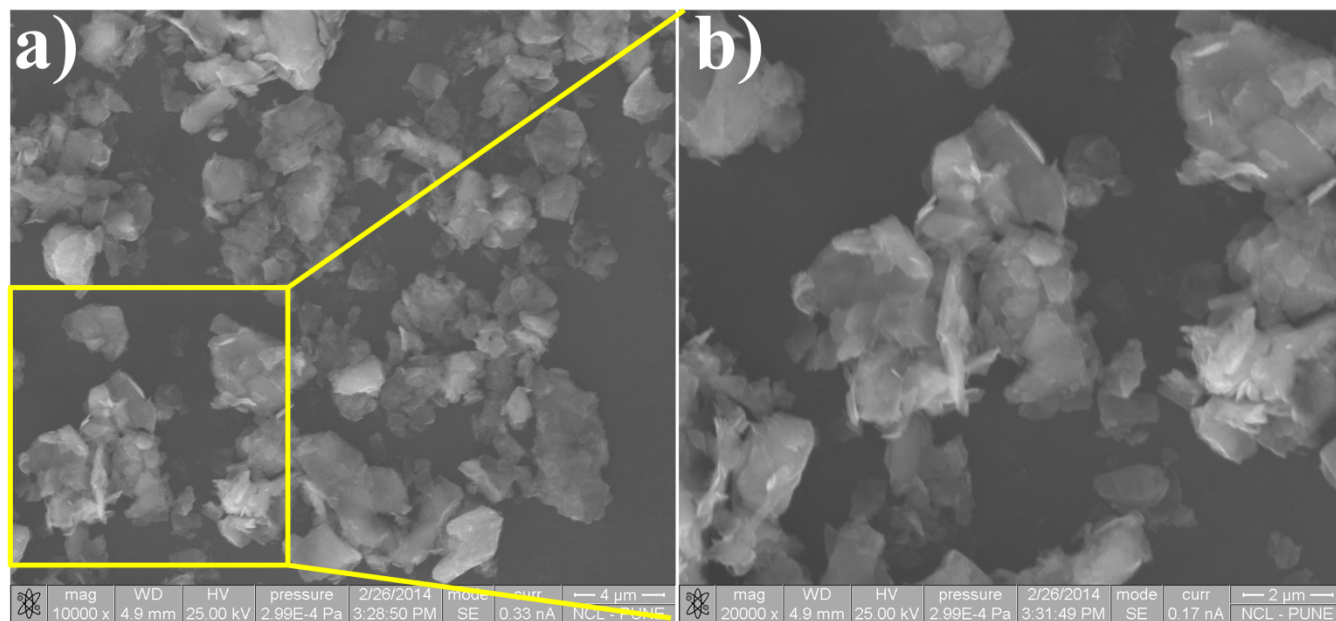

Fig. S2. SEM image of acid-intercalated exfoliated MoS<sub>2</sub> nanosheets deposited on Si wafer.

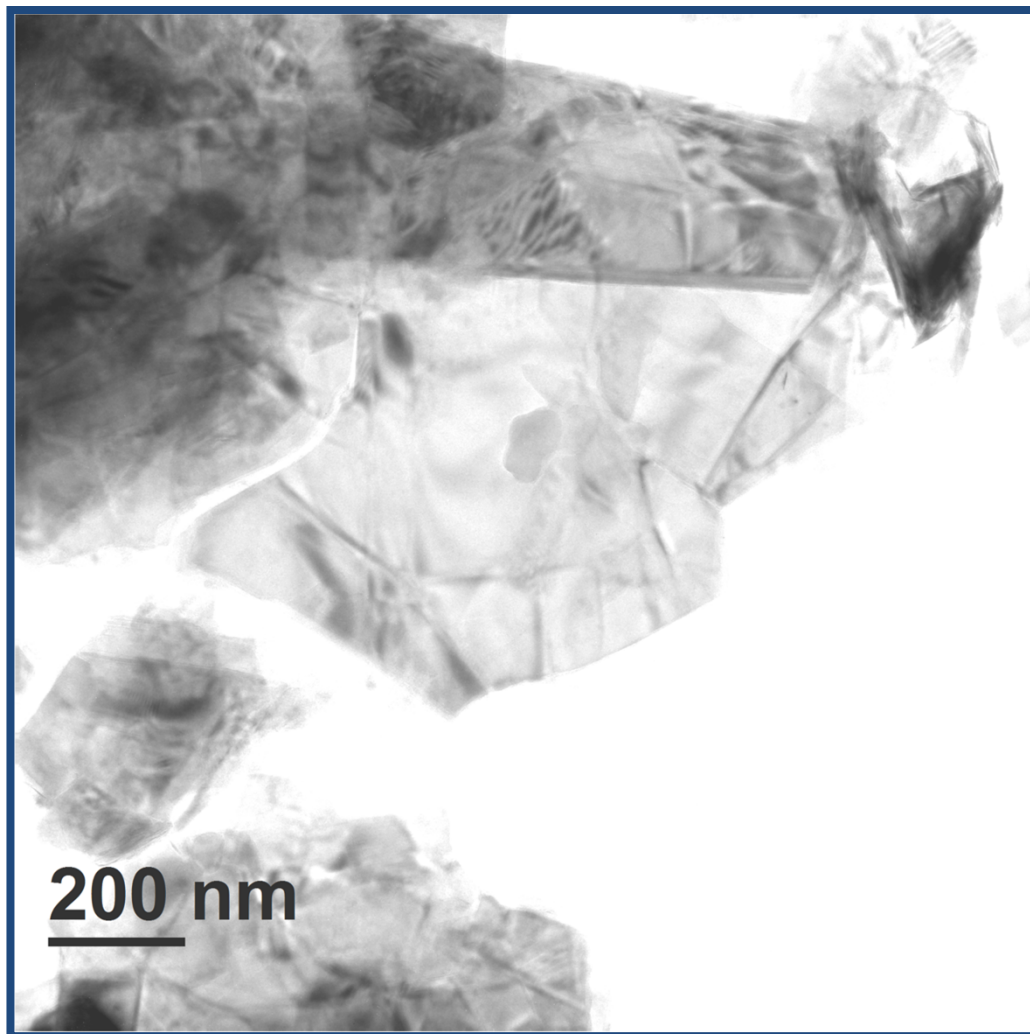

Fig. S3. HRTEM of MoS<sub>2</sub> image display the curved graphene like morphology at low magnification.

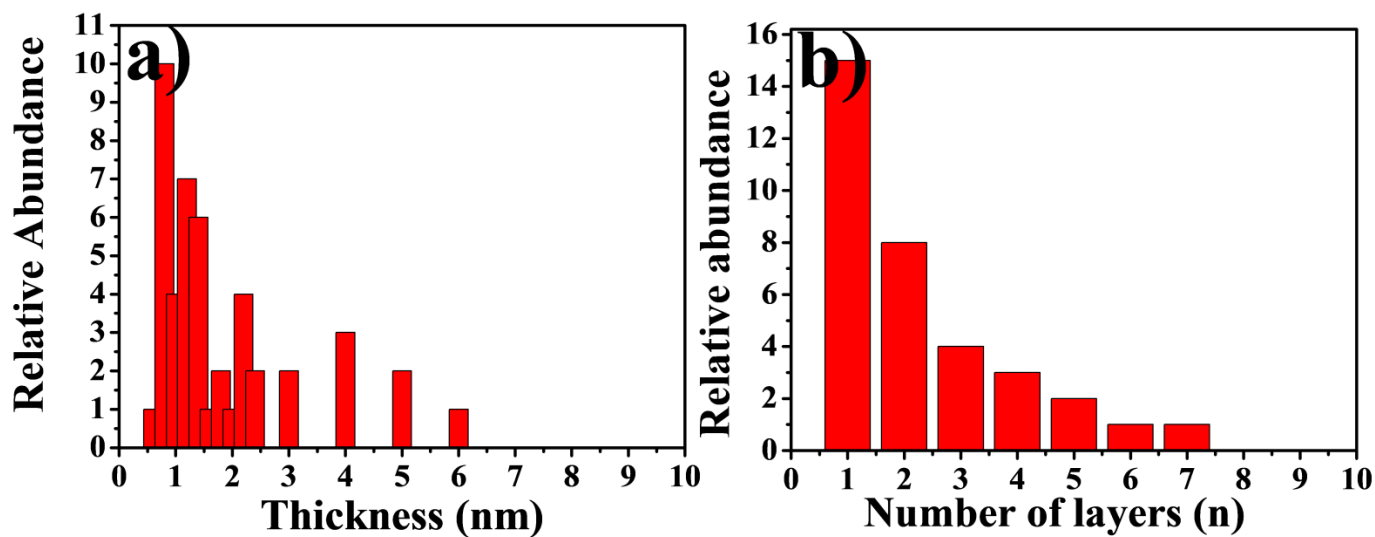

Fig. S4. Thickness distribution based on 50 randomly selected 2D nanosheets of MoS<sub>2</sub> in the AFM topographic image, Fig. 4a.

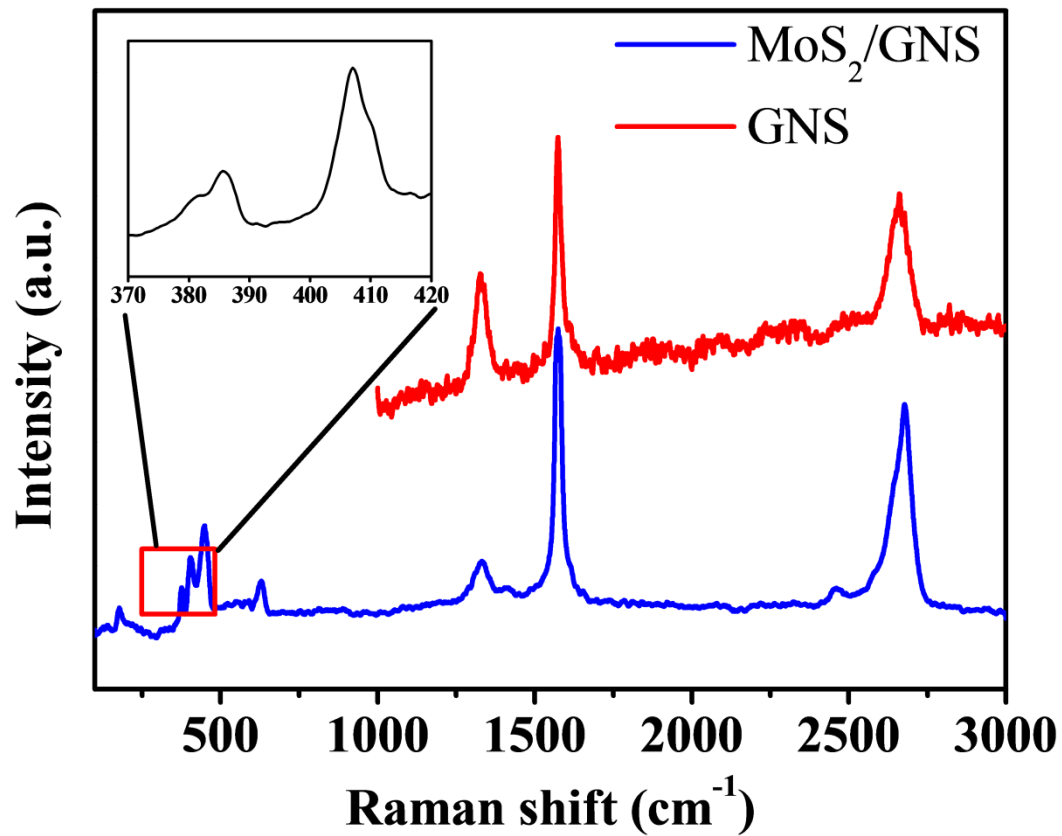

Fig. S5 Raman spectra of GNS and MoS<sub>2</sub>-GNS composite

Table S1:

| Scan Rate             | Specific capacitance $Fg^{-1}$ from Cyclic Voltametry |          |           |           | % Retention |
|-----------------------|-------------------------------------------------------|----------|-----------|-----------|-------------|
|                       | 20mVs-1                                               | 50 mVs-1 | 100 mVs-1 | 150 mVs-1 |             |
| MoS <sub>2</sub>      | 155                                                   | 153      | 124       | 108       | 69%         |
| MoS <sub>2</sub> /GNS | 282                                                   | 169      | 152       | 141       | 85%         |

Table S2:

| Current Density       | Specific capacitance $Fg^{-1}$ from Galvanostatic charge discharge |            |            |            | % Retention |
|-----------------------|--------------------------------------------------------------------|------------|------------|------------|-------------|
|                       | 20 $\mu$ A                                                         | 40 $\mu$ A | 60 $\mu$ A | 80 $\mu$ A |             |
| MoS <sub>2</sub>      | 156                                                                | 152        | 147        | 144        | 92.3%       |
| MoS <sub>2</sub> /GNS | 255                                                                | 243        | 240        | 236        | 92.5%       |

## References

1. K.-J. Huang, L. Wang, Y.-J. Liu, Y.-M. Liu, H.-B. Wang, T. Gan and L.-L. Wang, *J of Hydrogen Energy*, 2013, **38**, 14027.
2. G. Huang, T. Chen, W. Chen, Z. Wang, K. Chang, L. Ma, F. Huang, D. Chen and Y. Lee, *Small*, 2013, **9**, 3693.
